# Supplementary material
Source: ML conference proceedings conference paper supplement (https://proceedings.neurips.cc/paper_files/paper/2018/hash/c157297d1a1ff043255bfb18530caaa2-Abstract.html)
Supplement: Supplementary file [file c157297d1a1ff043255bfb18530caaa2-Supplemental.zip]

# Appendices

## A Proof of lemma 2

**Proof.** For deterministic schedule,

$$\mathbb{E}[J(\theta_*)] = \mathbb{E}[J(\tilde{\theta}_t)] .$$

Thus we can write

$$\begin{aligned} R_T &= \sum_{t=1}^T \mathbb{E}[\ell(x_t, a_t) - J(\theta_*)] \\ &= \sum_{t=1}^T \mathbb{E}[\ell(x_t, a_t) - J(\tilde{\theta}_t)] \\ &= \sum_{t=1}^T \mathbb{E}[h_t(x_t) - \mathbb{E}[h_t(\tilde{x}_{t+1}) | \mathcal{F}_t, \tilde{\theta}_t]] \\ &= \sum_{t=1}^T \mathbb{E}[h_t(x_t) - h_t(\tilde{x}_{t+1})] . \end{aligned}$$

Thus, we can bound the regret using

$$\begin{aligned} R_T &= \mathbb{E}[h_1(x_1) - h_{T+1}(x_{T+1})] \\ &\quad + \sum_{t=1}^T \mathbb{E}[h_{t+1}(x_{t+1}) - h_t(\tilde{x}_{t+1})] \\ &\leq H + \sum_{t=1}^T \mathbb{E}[h_{t+1}(x_{t+1}) - h_t(\tilde{x}_{t+1})] , \end{aligned}$$

where the second inequality follows because  $h_1(x_1) \leq H$  and  $-h_{T+1}(x_{T+1}) \leq 0$ . Let  $A_t$  denote the event that the algorithm has changed its policy at time  $t$ . We can write

$$\begin{aligned} R_T - H &\leq \sum_{t=1}^T \mathbb{E}[h_{t+1}(x_{t+1}) - h_t(\tilde{x}_{t+1})] \\ &= \sum_{t=1}^T \mathbb{E}[h_{t+1}(x_{t+1}) - h_t(x_{t+1})] \\ &\quad + \sum_{t=1}^T \mathbb{E}[h_t(x_{t+1}) - h_t(\tilde{x}_{t+1})] \\ &\leq H \sum_{t=1}^T \mathbb{E}[\mathbf{1}\{A_t\}] \\ &\quad + \sum_{t=1}^T \mathbb{E}[h_t(x_{t+1}) - h_t(\tilde{x}_{t+1})] . \end{aligned}$$

■

## B Proof of lemma 3

**Proof.** By Cauchy-Schwarz inequality and Lipschitz dynamics assumption,

$$\begin{aligned} \Delta_t &\leq \left\| P(\cdot | x_t, a_t, \theta_*) - P(\cdot | x_t, a_t, \tilde{\theta}_t) \right\|_1 \|h_t\|_\infty \\ &\leq CH \left| \theta_* - \tilde{\theta}_t \right| . \end{aligned}$$

Recall that  $\tilde{\theta}_t = \tilde{\theta}_{\tau_t}$ . Let  $T_j$  be the length of episode  $j$ . Because we have  $m$  episodes, we can write

$$\begin{aligned} \sum_{t=1}^T \Delta_t &\leq \sqrt{T \sum_{t=1}^T \Delta_t^2} \\ &= CH \sqrt{T \sum_{j=1}^m \sum_{s=1}^{T_j} |\theta_* - \tilde{\theta}_j|^2} \\ &= CH \sqrt{T \sum_{j=1}^m M_j |\theta_* - \tilde{\theta}_j|^2}, \end{aligned}$$

where  $M_j$  is the number of steps in the  $j$ th episode. Thus

$$\begin{aligned} \mathbb{E} \left[ \sum_{t=1}^T \Delta_t \right] &\leq CHE \left[ \sqrt{T \sum_{j=1}^m M_j |\theta_* - \tilde{\theta}_j|^2} \right] \\ &\leq CH \sqrt{T \mathbb{E} \left[ \sum_{j=1}^m M_j |\theta_* - \tilde{\theta}_j|^2 \right]}. \end{aligned}$$

■

## C Proof of lemma 4

**Proof.** Let  $S = \mathbb{E} \left[ \sum_{j=1}^m M_j |\theta_* - \tilde{\theta}_j|^2 \right]$ . Let  $N_j$  be one plus the number of steps in the first  $j$  episodes. So  $N_j = N_{j-1} + M_j$  and  $N_0 = 1$ . We write

$$\begin{aligned} S &= \mathbb{E} \left[ \sum_{j=1}^m N_{j-1} |\theta_* - \tilde{\theta}_j|^2 \frac{M_j}{N_{j-1}} \right] \\ &\stackrel{(a)}{\leq} 2 \mathbb{E} \left[ \sum_{j=1}^m N_{j-1} |\theta_* - \tilde{\theta}_j|^2 \right] \\ &\stackrel{(b)}{\leq} 2 \log T \max_j \mathbb{E} \left[ N_{j-1} |\theta_* - \tilde{\theta}_j|^2 \right] \\ &\stackrel{(c)}{\leq} 2C' \log^2 T, \end{aligned}$$

where (a) follows from the fact that  $M_j/N_{j-1} \leq 2$  for all  $j$ , (b) follows from

$$\mathbb{E} \left[ \sum_{j=1}^m N_{j-1} |\theta_* - \tilde{\theta}_j|^2 \right] \leq m \max_j \mathbb{E} \left[ N_{j-1} |\theta_* - \tilde{\theta}_j|^2 \right]$$

and  $m \leq \log T$ , and (c) follows from Assumption A2. ■

## D Proof of lemma 5

**Proof.** To simplify the expositions, we use  $p$  to denote  $P(s = a|X)$  in this proof. Notice that  $z(\theta) = \frac{1-p}{1-p^{1/\theta}}$ . Based on the definition of  $\|\cdot\|_1$ , we have

$$\begin{aligned}
& \|P(\cdot|X, a, \theta) - P(\cdot|X, a, \theta')\|_1 \\
&= \left| p^{\frac{1}{\theta}} - p^{\frac{1}{\theta'}} \right| + \sum_{s \neq a} \left| \frac{P(s|X)}{z(\theta)} - \frac{P(s|X)}{z(\theta')} \right| \\
&= \left| p^{\frac{1}{\theta}} - p^{\frac{1}{\theta'}} \right| + \left| \frac{1-p^{1/\theta}}{1-p} - \frac{1-p^{1/\theta'}}{1-p} \right| \sum_{s \neq a} P(s|X) \\
&= \left| p^{\frac{1}{\theta}} - p^{\frac{1}{\theta'}} \right| + \left| \frac{1-p^{1/\theta}}{1-p} - \frac{1-p^{1/\theta'}}{1-p} \right| (1-p) \\
&= 2 \left| p^{\frac{1}{\theta}} - p^{\frac{1}{\theta'}} \right|. \tag{6}
\end{aligned}$$

We also define  $h(\theta, p) \triangleq p^{\frac{1}{\theta}}$ . Based on calculus, we have

$$\begin{aligned}
\frac{\partial h}{\partial \theta}(\theta, p) &= p^{\frac{1}{\theta}} \log\left(\frac{1}{p}\right) \frac{1}{\theta^2} \\
\frac{\partial^2 h}{\partial \theta \partial p}(\theta, p) &= \frac{1}{\theta^2} p^{\frac{1}{\theta}-1} \left[ \frac{1}{\theta} \log\left(\frac{1}{p}\right) - 1 \right]. \tag{7}
\end{aligned}$$

The first equation implies that  $h$  is strictly increasing in  $\theta$ , and the second equation implies that for all  $\theta > 0$ ,  $\frac{\partial h}{\partial \theta}(\theta, p)$  is maximized by setting  $p = \exp(-\theta)$ . This implies that for all  $\theta > 0$ , we have

$$0 < \frac{\partial h}{\partial \theta}(\theta, p) \leq \frac{\partial h}{\partial \theta}(\theta, \exp(-\theta)) = \frac{1}{e\theta}.$$

Hence, for all  $\theta \geq 1$ , we have  $0 < \frac{\partial h}{\partial \theta}(\theta, p) \leq \frac{1}{e\theta} \leq \frac{1}{e}$ . Consequently,  $h(\theta, p)$  as a function of  $\theta$  is globally  $(\frac{1}{e})$ -Lipschitz continuous for  $\theta \geq 1$ . So we have

$$\|P(\cdot|X, a, \theta) - P(\cdot|X, a, \theta')\|_1 = 2 \left| p^{\frac{1}{\theta}} - p^{\frac{1}{\theta'}} \right| \leq \frac{2}{e} |\theta - \theta'|.$$

■

## E Posterior Concentration for POI Recommendation

Recall that the parameter space  $\Theta = \{\theta_1, \dots, \theta_K\}$  is a finite set, and  $\theta_*$  is the true parameter. Notice that if  $P(s_t = a_t|X_t)$  is close to 0 or 1, then the DS-PSRL will not learn much about  $\theta_*$  at time  $t$ , since in such cases  $P(s_t|X_t, a_t, \theta)$ 's are roughly the same for all  $\theta \in \Theta$ . Hence, to derive the concentration result, we make the following simplifying assumption:

$$\Delta_P \leq P(s|X) \leq 1 - \Delta_P \quad \forall (X, s)$$

for some  $\Delta_P \in (0, 0.5)$ . Moreover, we assume that all the elements in  $\Theta$  are distinct, and define

$$\Delta_\theta \triangleq \min_{\theta \in \Theta, \theta \neq \theta_*} |\theta - \theta_*|$$

as the minimum gap between  $\theta_*$  and another  $\theta \neq \theta_*$ . To simplify the exposition, we also define

$$\begin{aligned}
B &\triangleq 2 \max \left\{ \max_{\theta \in \Theta} \max_{p \in [\Delta_P, 1-\Delta_P]} \left| \log \left( \frac{p^{1/\theta}}{p^{1/\theta_*}} \right) \right|, \right. \\
&\quad \left. \max_{\theta \in \Theta} \max_{p \in [\Delta_P, 1-\Delta_P]} \left| \log \left( \frac{1-p^{1/\theta}}{1-p^{1/\theta_*}} \right) \right| \right\} \\
c_0 &\triangleq \frac{\min \left\{ \ln \left( \frac{1}{\Delta_P} \right) \Delta_P, \ln \left( \frac{1}{1-\Delta_P} \right) (1-\Delta_P) \right\}}{(\max_{\theta \in \Theta} \theta)^2} \\
\kappa &\triangleq \left( \max_{\theta \in \Theta} \theta - \min_{\theta \in \Theta} \theta \right)^2.
\end{aligned}$$

Then we have the following lemma about the concentrating posterior of this problem:

**Lemma 6** (Concentration) Assume that  $\theta_t$  is sampled from  $P_t$  at time step  $t$ , then under the above assumptions, for any  $t > 2$ , we have

$$\mathbb{E} [(\theta_t - \theta_*)^2] \leq \frac{3}{ec_0^2 t} \frac{1 - P_0(\theta_*)}{P_0(\theta_*)} \times \exp \left\{ -c_0^2 \Delta_\theta^2 t + \sqrt{2B^2 t \ln(K\kappa t^2)} \right\} + \frac{1}{t^2},$$

where  $B$ ,  $c_0$ , and  $\kappa$  are constants defined above. Note that they only depend on  $\Delta_P$  and  $\Theta$

Notice that Lemma 6 implies that

$$t\mathbb{E} [(\theta_t - \theta_*)^2] \leq O \left( \exp \left\{ -c_0^2 \Delta_\theta^2 t + \sqrt{2B^2 t \ln(K\kappa t^2)} \right\} \right) + \frac{1}{t} = O(1)$$

for any  $t > 2$ . This directly implies that  $\max_j \mathbb{E} \left[ N_{j-1} \left| \theta_* - \tilde{\theta}_j \right|^2 \right] = O(1)$ . Q.E.D.

### E.1 Proof of lemma 6

**Proof.** We use  $P_0$  to denote the prior over  $\theta$ , and use  $P_t$  to denote the posterior distribution over  $\theta$  at the end of time  $t$ . Note that by Bayes rule, we have

$$P_t(\theta) \propto P_0(\theta) \prod_{\tau=1}^t P(s_\tau | X_\tau, a_\tau, \theta) \quad \forall t \text{ and } \forall \theta \in \Theta.$$

We also define the posterior log-likelihood of  $\theta$  at time  $t$  as

$$\Lambda_t(\theta) = \log \left\{ \frac{P_t(\theta)}{P_t(\theta_*)} \right\} = \log \left\{ \frac{P_0(\theta)}{P_0(\theta_*)} \prod_{\tau=1}^t \left[ \frac{P(s_\tau | X_\tau, a_\tau, \theta)}{P(s_\tau | X_\tau, a_\tau, \theta_*)} \right] \right\}$$

for all  $t$  and all  $\theta \in \Theta$ . Notice that  $P_t(\theta) \leq \exp[\Lambda_t(\theta)]$  always holds, and  $\Lambda_t(\theta_*) = 0$  by definition.

We also define  $p_t \triangleq P(s_t = a_t | X_t)$  to simplify the exposition. Note that by definition, we have

$$P(s_t | X_t, a_t, \theta) = \begin{cases} p_t^{1/\theta} & \text{if } s_t = a_t \\ \frac{P(s_t | X_t)}{1 - p_t} (1 - p_t^{1/\theta}) & \text{otherwise} \end{cases}$$

Define the indicator  $z_t = \mathbf{1} \{s_t = a_t\}$ , then we have

$$\log \left\{ \frac{P(s_t | X_t, a_t, \theta)}{P(s_t | X_t, a_t, \theta_*)} \right\} = z_t \log \left[ \frac{p_t^{1/\theta}}{p_t^{1/\theta_*}} \right] + (1 - z_t) \log \left[ \frac{1 - p_t^{1/\theta}}{1 - p_t^{1/\theta_*}} \right]$$

Since  $p_t$  is  $\mathcal{F}_{t-1}$ -adaptive, we have

$$\begin{aligned} & \mathbb{E} \left[ \log \left\{ \frac{P(s_t | X_t, a_t, \theta)}{P(s_t | X_t, a_t, \theta_*)} \right\} \middle| \mathcal{F}_{t-1}, \theta_* \right] \\ &= p_t^{1/\theta_*} \log \left[ \frac{p_t^{1/\theta}}{p_t^{1/\theta_*}} \right] + (1 - p_t^{1/\theta_*}) \log \left[ \frac{1 - p_t^{1/\theta}}{1 - p_t^{1/\theta_*}} \right] \\ &= -\text{D}_{\text{KL}} \left( p_t^{1/\theta_*} \| p_t^{1/\theta} \right) \leq -2 \left( p_t^{1/\theta_*} - p_t^{1/\theta} \right)^2, \end{aligned}$$

where the last inequality follows from Pinsker's inequality. Notice that function  $h(x) = p_t^x$  is a strictly convex function of  $x$ , and  $\frac{dh}{dx}(x) = p_t^x \ln(p_t)$ , we have

$$p_t^{1/\theta} - p_t^{1/\theta_*} \geq \ln(p_t) p_t^{1/\theta_*} (1/\theta - 1/\theta_*) = \ln(1/p_t) p_t^{1/\theta_*} \frac{(\theta - \theta_*)}{\theta \theta_*}$$

Similarly, we have  $p_t^{1/\theta_*} - p_t^{1/\theta} \geq \ln(1/p_t) p_t^{1/\theta} \frac{(\theta_* - \theta)}{\theta \theta_*}$ . Consequently, we have

$$\begin{aligned} \left| p_t^{1/\theta} - p_t^{1/\theta_*} \right| &\geq \ln(1/p_t) \min \left\{ p_t^{1/\theta_*}, p_t^{1/\theta} \right\} \frac{|\theta - \theta_*|}{\theta \theta_*} \\ &\geq \ln(1/p_t) p_t \frac{|\theta - \theta_*|}{\theta \theta_*}, \end{aligned}$$

where the last inequality follows from the fact  $\theta, \theta_* \in [1, \infty)$ . Since function  $\ln(1/x)x$  is concave on  $[0, 1]$  and  $p_t \in [\Delta_P, 1 - \Delta_P]$ , we have  $\ln(1/p_t)p_t \geq \min\{\ln(1/\Delta_P)\Delta_P, \ln(1/(1 - \Delta_P))(1 - \Delta_P)\}$ . Define

$$c_0 \triangleq \frac{\min\{\ln(1/\Delta_P)\Delta_P, \ln(1/(1 - \Delta_P))(1 - \Delta_P)\}}{(\max_{\theta \in \Theta} \theta)^2}, \quad (8)$$

then we have  $|p_t^{1/\theta} - p_t^{1/\theta_*}| \geq c_0|\theta - \theta_*|$ . Hence we have

$$-D_{\text{KL}}(p_t^{1/\theta_*} \| p_t^{1/\theta}) \leq -2c_0^2(\theta - \theta_*)^2.$$

Furthermore, we define

$$\begin{aligned} \xi_t(\theta) &\triangleq \log \left\{ \frac{P(s_t | X_t, a_t, \theta)}{P(s_t | X_t, a_t, \theta_*)} \right\} \\ &\quad - \mathbb{E} \left[ \log \left\{ \frac{P(s_t | X_t, a_t, \theta)}{P(s_t | X_t, a_t, \theta_*)} \right\} \middle| \mathcal{F}_{t-1}, \theta_* \right]. \end{aligned} \quad (9)$$

Obviously, by definition,  $\mathbb{E}[\xi_t(\theta) | \mathcal{F}_{t-1}, \theta_*] = 0$ . We also define

$$\begin{aligned} B &\triangleq 2 \max \left\{ \max_{\theta \in \Theta} \max_{p \in [\Delta_P, 1 - \Delta_P]} \left| \log \left( \frac{p^{1/\theta}}{p^{1/\theta_*}} \right) \right|, \right. \\ &\quad \left. \max_{\theta \in \Theta} \max_{p \in [\Delta_P, 1 - \Delta_P]} \left| \log \left( \frac{1 - p^{1/\theta}}{1 - p^{1/\theta_*}} \right) \right| \right\}, \end{aligned} \quad (10)$$

then  $|\xi_t(\theta)| \leq B$  always holds. This allows us to use Azuma's inequality. Specifically, for any  $\theta \in \Theta$ , any  $t$ , and any  $\delta \in (0, 1)$ , we have  $\sum_{\tau=1}^t \xi_\tau(\theta) \leq \sqrt{2B^2 t \ln(K/\delta)}$  with probability at least  $1 - \delta/K$ . Taking a union bound over  $\theta \in \Theta$ , we have

$$\sum_{\tau=1}^t \xi_\tau(\theta) \leq \sqrt{2B^2 t \ln(K/\delta)} \quad \forall \theta \in \Theta \quad (11)$$

with probability at least  $1 - \delta$ . Consequently, we have

$$\begin{aligned} \Lambda_t(\theta) &= \log \left\{ \frac{P_0(\theta)}{P_0(\theta_*)} \right\} \\ &\quad + \sum_{\tau=1}^t \left\{ z_\tau \log \left[ \frac{p_\tau^{1/\theta}}{p_\tau^{1/\theta_*}} \right] + (1 - z_\tau) \log \left[ \frac{1 - p_\tau^{1/\theta}}{1 - p_\tau^{1/\theta_*}} \right] \right\} \\ &= \log \left\{ \frac{P_0(\theta)}{P_0(\theta_*)} \right\} - \sum_{\tau=1}^t D_{\text{KL}}(p_\tau^{1/\theta_*} \| p_\tau^{1/\theta}) + \sum_{\tau=1}^t \xi_\tau(\theta) \\ &\leq \log \left\{ \frac{P_0(\theta)}{P_0(\theta_*)} \right\} - 2c_0^2(\theta - \theta_*)^2 t + \sum_{\tau=1}^t \xi_\tau(\theta) \end{aligned} \quad (12)$$

Combining the above inequality with equation 11, we have

$$\Lambda_t(\theta) \leq \log \left\{ \frac{P_0(\theta)}{P_0(\theta_*)} \right\} - 2c_0^2(\theta - \theta_*)^2 t + \sqrt{2B^2 t \ln(K/\delta)} \quad \forall \theta \in \Theta$$

with probability at least  $1 - \delta$ . Hence, we have

$$\begin{aligned} P_t(\theta) &\leq \exp[\Lambda_t(\theta)] \\ &\leq \frac{P_0(\theta)}{P_0(\theta_*)} \exp \left\{ -2c_0^2(\theta - \theta_*)^2 t + \sqrt{2B^2 t \ln(K/\delta)} \right\} \end{aligned} \quad (13)$$

for all  $\theta \in \Theta$  with probability at least  $1 - \delta$ . Thus, for any  $\mathcal{F}_{t-1}$  s.t. the above inequality holds, we have

$$\begin{aligned} \mathbb{E}[(\theta_t - \theta_*)^2 | \mathcal{F}_{t-1}, \theta_*] &= \sum_{\theta \neq \theta_*} P_t(\theta) (\theta - \theta_*)^2 \\ &\leq \sum_{\theta \neq \theta_*} \frac{P_0(\theta)}{P_0(\theta_*)} \exp \left\{ -2c_0^2(\theta - \theta_*)^2 (t-1) \right. \\ &\quad \left. + \sqrt{2B^2 (t-1) \ln(K/\delta)} \right\} (\theta - \theta_*)^2 \end{aligned} \quad (14)$$

For  $t > 2$ , we have

$$\exp \left\{ -c_0^2(\theta - \theta_*)^2(t-2) \right\} (\theta - \theta_*)^2 \leq \frac{1}{ec_0^2(t-2)} \leq \frac{3}{ec_0^2 t},$$

where the last inequality follows from the fact that  $t-2 \geq \frac{t}{3}$ . Hence we have

$$\begin{aligned} & \mathbb{E} [(\theta_t - \theta_*)^2 | \mathcal{F}_{t-1}, \theta_*] \\ & \leq \frac{3}{ec_0^2 t} \sum_{\theta \neq \theta_*} \frac{P_0(\theta)}{P_0(\theta_*)} \exp \left\{ -c_0^2(\theta - \theta_*)^2 t + \sqrt{2B^2 t \ln(K/\delta)} \right\} \\ & \leq \frac{3}{ec_0^2 t} \sum_{\theta \neq \theta_*} \frac{P_0(\theta)}{P_0(\theta_*)} \exp \left\{ -c_0^2 \Delta_\theta^2 t + \sqrt{2B^2 t \ln(K/\delta)} \right\} \\ & = \frac{3}{ec_0^2 t} \frac{1 - P_0(\theta_*)}{P_0(\theta_*)} \exp \left\{ -c_0^2 \Delta_\theta^2 t + \sqrt{2B^2 t \ln(K/\delta)} \right\}, \end{aligned}$$

where the second inequality follows from  $(\theta - \theta_*)^2 \geq \Delta_\theta^2$ . For  $\mathcal{F}_{t-1}$  s.t. inequality 13 does not hold, we use the naive bound

$$(\theta_t - \theta_*)^2 \leq \kappa \triangleq \left( \max_{\theta \in \Theta} \theta - \min_{\theta \in \Theta} \theta \right)^2.$$

Since inequality 13 holds with probability at least  $1 - \delta$ , we have

$$\begin{aligned} & \mathbb{E} [(\theta_t - \theta_*)^2 | \theta_*] \\ & \leq \frac{3}{ec_0^2 t} \frac{1 - P_0(\theta_*)}{P_0(\theta_*)} \exp \left\{ -c_0^2 \Delta_\theta^2 t + \sqrt{2B^2 t \ln(K/\delta)} \right\} + \delta \kappa. \end{aligned} \tag{15}$$

Finally, by choosing  $\delta = \frac{1}{\kappa t^2}$  and taking an expectation over  $\theta_*$ , we have

$$\begin{aligned} & \mathbb{E} [(\theta_t - \theta_*)^2] \\ & \leq \frac{3}{ec_0^2 t} \frac{1 - P_0(\theta_*)}{P_0(\theta_*)} \exp \left\{ -c_0^2 \Delta_\theta^2 t + \sqrt{2B^2 t \ln(K\kappa t^2)} \right\} + \frac{1}{t^2}. \end{aligned} \tag{16}$$

■
